# Supplementary material for: Poly(vinylidene fluoride)–La0.5Sr0.5CoO3−δ composites: the influence of LSCO particle size on the structure and dielectric properties
Source: Royal Society of Chemistry journal article supplement (doi:10.1039/c4cp01924e), 2014-01-01
Supplement: c4cp01924e1.pdf [file c4cp01924e1.pdf]

## Electronic Supporting Information

### Poly(vinylidene fluoride)/La<sub>0.5</sub>Sr<sub>0.5</sub>CoO<sub>3-δ</sub> Composites: Influence of LSCO Particle Size on the Structure and Dielectric Properties

K. S. Deepa, P. Shaiju, M. T. Sebastian, E. Bhoje Gowd\* and J. James\*

Materials Science and Technology Division,  
CSIR-National Institute for Interdisciplinary Science and Technology,  
Trivandrum - 695 019, Kerala, India

\*Corresponding Authors:

E-mails: [jamesj21058@yahoo.com](mailto:jamesj21058@yahoo.com) and [bhojegovd@niist.res.in](mailto:bhojegovd@niist.res.in)

Tel: +91 471 2515313, +91 471 2515474 Fax: +91 471 2491712

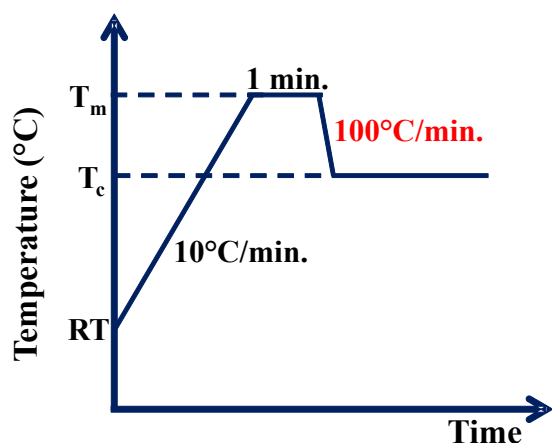

Fig. S1 DSC temperature programme used for the isothermal crystallization of PVDF and its composites.

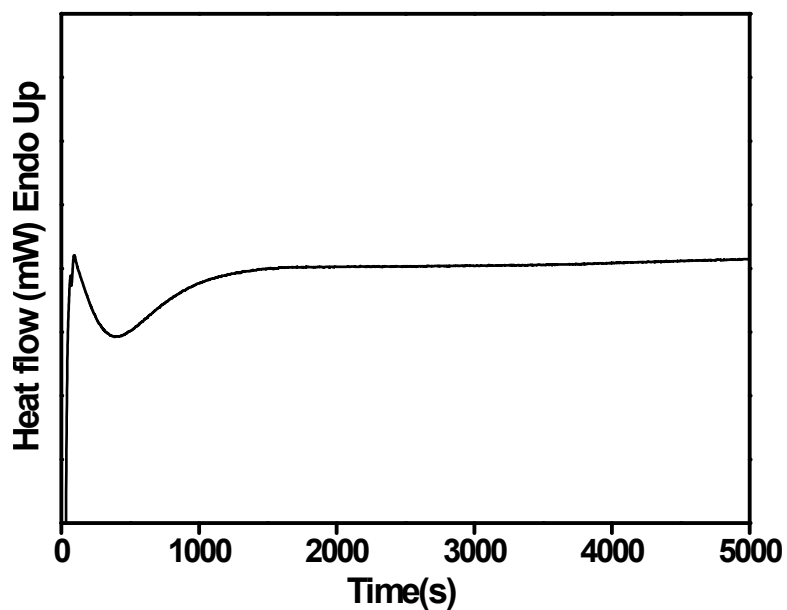

Fig. S2 DSC isothermal crystallization thermogram of PVDF at 140°C.

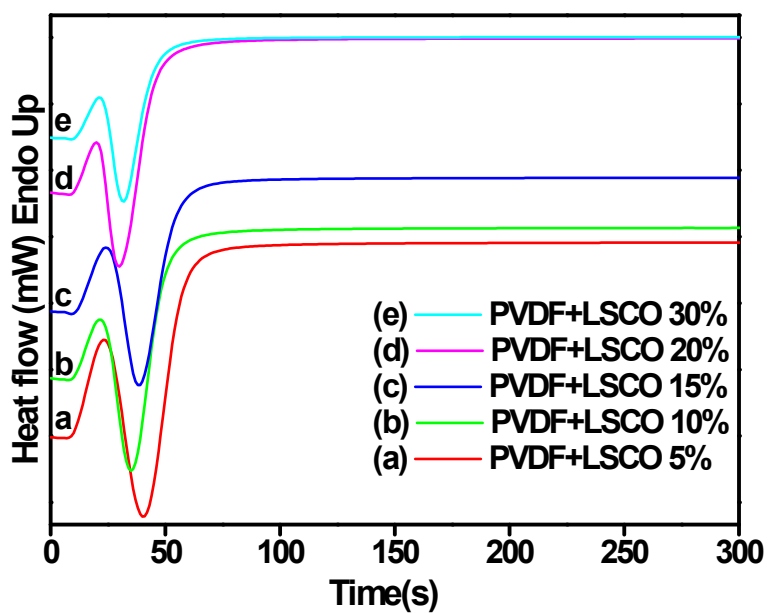

Fig. S3 DSC isothermal crystallization thermograms of PVDF/fine LSCO composites at 140°C.

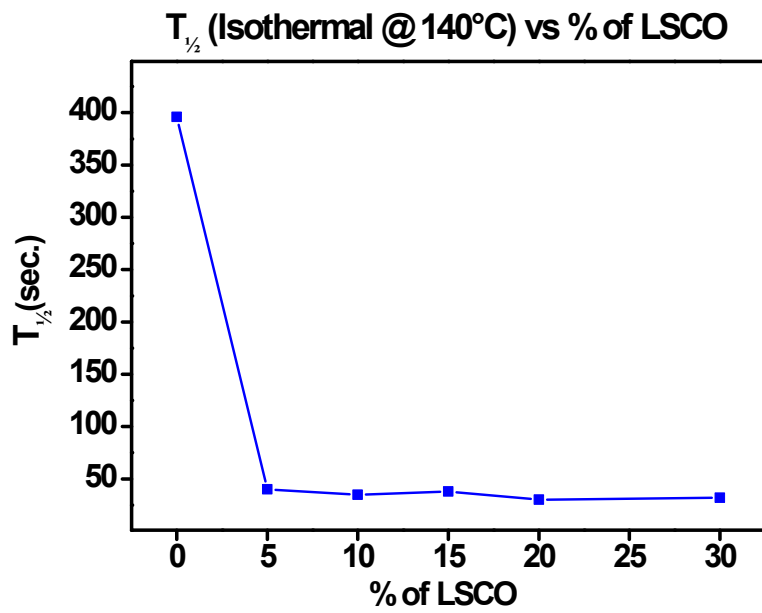

Fig. S4 Variation in the crystallization half time ( $T_{1/2}$ ) with the increasing volume percentage of fine LSCO.

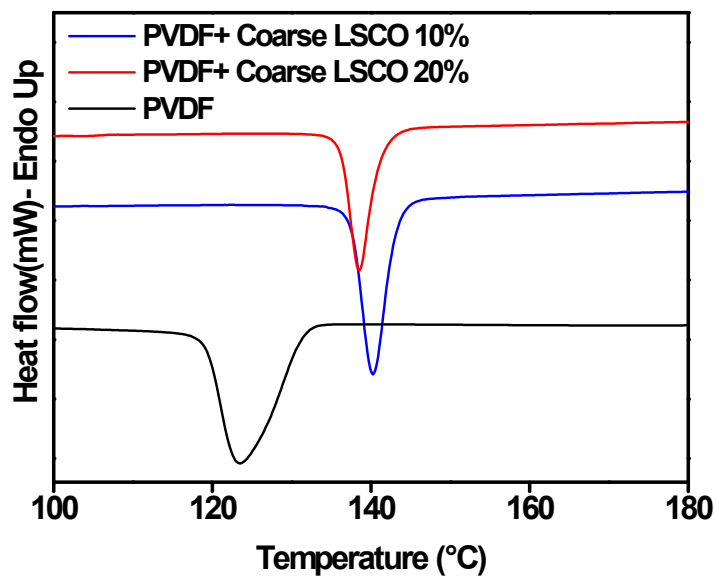

Fig. S5 DSC cooling curves obtained for PVDF and PVDF/Coarse LSCO composites.

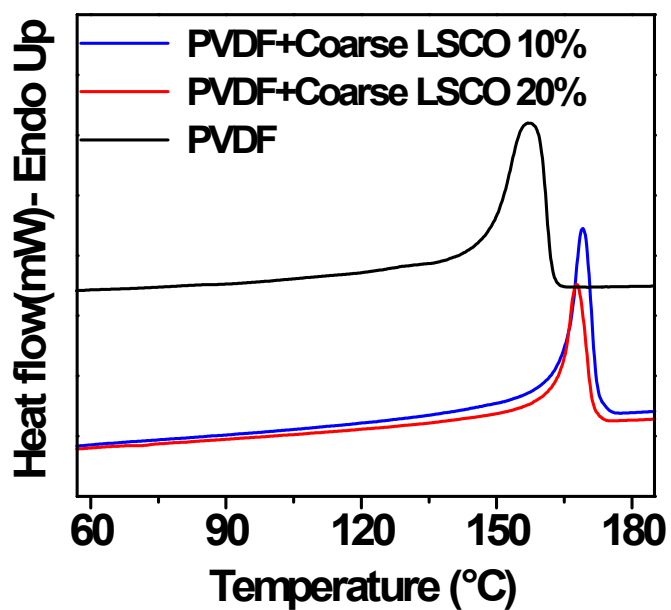

**Fig. S6** Variation in the melting point( $T_m$ ) of PVDF in the presence of coarse LSCO, obtained from the second heating in DSC.
